# Supplementary material for: Lipoprotein size is a main determinant for the rate of hydrolysis by exogenous LPL in human plasma
Source: PubMed Central journal article supplement (PMC8953621; doi:10.1016/j.jlr.2021.100144), 2021-10-26

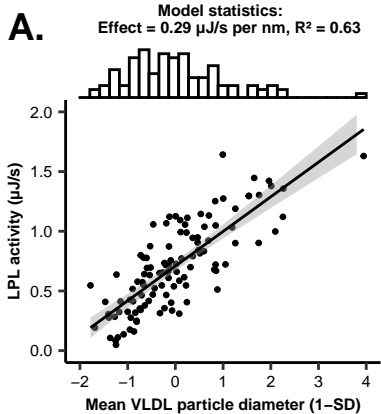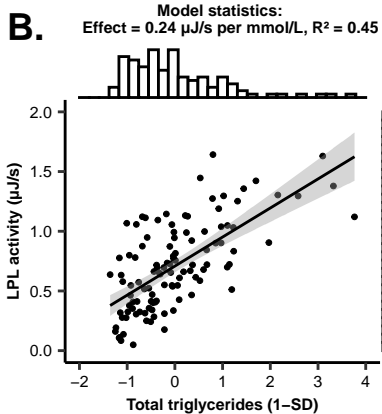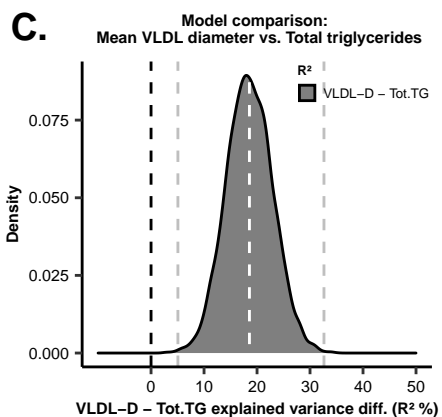

Supplement: mmc2.pdf [file mmc2.pdf]
